# Supplementary material for: Multi-year progeny test identifies superior progenies and a biennial yield pattern in macaw palm (Acrocomia aculeata)
Source: Research Square preprint supplement (doi:10.21203/rs.3.rs-8768177/v1), 2026-02-10
Supplement: Supplementary file 1 [file ed4c595674a3278a04436799.docx]

**Supplementary Table 1.** Superior macaw palm progeny individuals based on predicted means for fruit yield and precocity classification

| **Progeny** | **Mean**  **(Kg.plant -1)** | **Individual** | **Predicted Mean (Kg.plant -1)** | **Precocity** |
| --- | --- | --- | --- | --- |
| 7 | 17.98 | 5 | 29.24 | Late |
| 29 | 17.35 | 7 | 29.01 | Early |
| 7 | 17.98 | 6 | 28.57 | Late |
| 29 | 17.35 | 4 | 26.73 | Early |
| 18 | 16.06 | 8 | 26.64 | Early |
| 30 | 16.75 | 9 | 23.81 | Early |
| 18  30 | 16.06  16.75 | 9  1 | 23.02  22.01 | Late  Late |
